# Supplementary material
Source: publisher figshare collection journal article supplement (https://acs.figshare.com/ndownloader/files/4682503)

## Supporting Information

### Rh-Catalyzed Synthesis of Helically Chiral and Ladder-Type Molecules via [2 + 2 + 2] and Formal [2 + 1 + 2 + 1] Cycloadditions Involving C–C Triple Bond Cleavage

Ken Tanaka,\* Akiyoshi Kamisawa, Takeshi Suda, Keiichi Noguchi, and Masao Hirano

*Department of Applied Chemistry, Graduate School of Engineering, and Instrumentation Analysis Center, Tokyo University of Agriculture and Technology, Koganei, Tokyo 184-8588, Japan*

#### I. General

Anhydrous  $\text{CH}_2\text{Cl}_2$  (No. 27,099-7),  $(\text{CH}_2\text{Cl})_2$  (No. 28,450-5), and THF (No. 18,656-2) were obtained from Aldrich and used as received. Tol-BINAP and xyl-Segphos [(4,4'-bi-1,3-benzodioxole)-5,5'-diylbis{di(3,5-dimethylphenyl)phosphine}] were obtained from Takasago International Corporation. All other reagents were obtained from commercial sources and used as received. All reactions were carried out under an atmosphere of argon in oven-dried glassware with magnetic stirring.

#### II. Synthesis of Triynes

##### 2-Methoxymethoxy-1-[2-(trimethylsilyl)ethynyl]naphthalene (**2**).

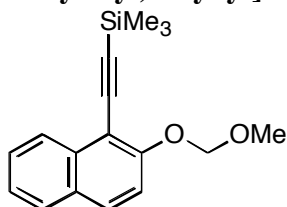

To a solution of 1-iodo-2-methoxymethoxynaphthalene<sup>1</sup> (**1**, 8.84 g, 28.1 mmol) and  $\text{Pd}(\text{PPh}_3)_4$  (325 mg, 0.281 mmol) in *i*-Pr<sub>2</sub>NH (200 mL) was added trimethylsilyl acetylene (5.6 mL, 139 mmol) at rt. The mixture was then stirred at rt for 5 min, and CuI (107 mg, 0.562 mmol) was added. The resulting mixture was stirred at rt for 23 h. The reaction mixture was filtered and concentrated. The crude alkyne **2** (10.89 g) was used in the next step without purification.

<sup>1</sup>H NMR ( $\text{CDCl}_3$ , 300 MHz)  $\delta$  8.32–8.23 (m, 1H), 7.85–7.72 (m, 2H), 7.62–7.51 (m, 1H), 7.46–7.36 (m, 1H), 7.35 (d,  $J = 9.3$  Hz, 1H), 5.37 (s, 2H), 3.60 (s, 3H), 0.35 (s, 9H).

##### 1-Ethynyl-2-(methoxymethoxy)naphthalene (**3**).<sup>1</sup>

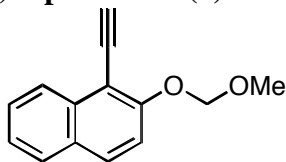

A solution of KOH (1.89 g, 33.7 mmol) in distilled water (7.4 mL) was added to a solution of the crude alkyne **2** (10.89 g) in MeOH (147 mL) and THF (37 mL). The mixture was stirred at rt for 45 min. The reaction mixture was diluted with water and extracted with ether. The organic layer was washed with brine, dried over Na<sub>2</sub>SO<sub>4</sub>, and concentrated. The residue was purified on a silica gel column chromatography (hexane/EtOAc = 10:1) to afford **3** (5.90 g, 27.8 mmol, 99% yield from **1**) as a pale red oil.

<sup>1</sup>H NMR (CDCl<sub>3</sub>, 300 MHz) δ 8.34–8.25 (m, 1H), 7.87–7.75 (m, 2H), 7.62–7.50 (m, 1H), 7.48–7.36 (m, 2H), 5.40 (s, 2H), 3.74 (s, 1H), 3.58 (s, 3H).

**Bis[2-(methoxymethoxy)naphthalen-1-yl]acetylene (**4**).**

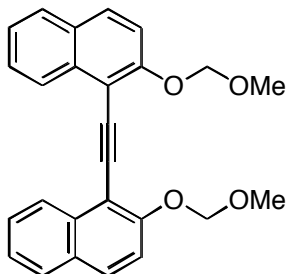

To a solution of **1** (1.57 g, 5.01 mmol) in *i*-Pr<sub>2</sub>NH (10 mL) were added Pd(PPh<sub>3</sub>)<sub>4</sub> (115.3 mg, 0.100 mmol) and CuI (38.0 mg, 0.200 mmol) and washed remaining materials away by using *i*-Pr<sub>2</sub>NH (10 mL). To the mixture was slowly added a solution of **3** (1.06 g, 5.00 mmol) in *i*-Pr<sub>2</sub>NH (30 mL). The resulting mixture was stirred at rt overnight. The reaction was quenched by the addition of water and extracted with CH<sub>2</sub>Cl<sub>2</sub>. The organic layer was washed with saturated aqueous NH<sub>4</sub>Cl, and the water layer was extracted with CH<sub>2</sub>Cl<sub>2</sub>. The combined organic layer was washed with brine, dried over Na<sub>2</sub>SO<sub>4</sub>, and concentrated. The residue was purified on a silica gel column chromatography (hexane/CH<sub>2</sub>Cl<sub>2</sub> = 1:1), which furnished **4** (1.88 g, 4.72 mmol, 95% yield from **3**) as a pale yellow solid.

<sup>1</sup>H NMR (CDCl<sub>3</sub>, 300 MHz) δ 8.69–8.59 (m, 2H), 7.91–7.78 (m, 4H), 7.66–7.54 (m, 2H), 7.51–7.40 (m, 4H), 5.51 (s, 4H), 3.63 (s, 6H).

**Bis(2-hydroxynaphthalen-1-yl)acetylene (**5**).**

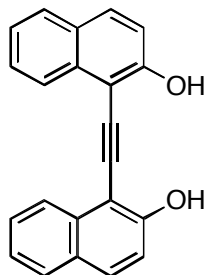

A solution of **4** (0.207 g, 0.520 mmol) in THF/H<sub>2</sub>O/conc HCl (6:2:1, 9 mL) was stirred at rt for 16 h. The reaction was quenched by the addition of water and extracted with CH<sub>2</sub>Cl<sub>2</sub>. The organic layer was washed with brine, dried over Na<sub>2</sub>SO<sub>4</sub>, and concentrated.

The residue was purified on a silica gel column chromatography (hexane/EtOAc = 10:1) to afford **5** (0.145 g, 0.466 mmol, 89% yield) as a pale yellow solid.

Mp 191.5–192.5 °C; IR (KBr) 3303, 3052, 1621, 1587, 1510, 1349, 1273, 1205, 955, 810, 742 cm<sup>-1</sup>; <sup>1</sup>H NMR (CDCl<sub>3</sub>, 300 MHz) δ 8.32–8.19 (m, 2H), 7.90–7.75 (m, 4H), 7.66–7.54 (m, 2H), 7.48–7.37 (m, 2H), 7.32–7.20 (m, 2H), 6.36 (s, 2H); <sup>13</sup>C NMR (CDCl<sub>3</sub>, 75 MHz) δ 156.3, 133.5, 131.2, 128.6, 128.4, 127.8, 124.9, 124.3, 116.6, 102.8, 93.3; HRMS (FAB) calcd for C<sub>22</sub>H<sub>14</sub>O<sub>2</sub> [M]<sup>+</sup> 310.0994, found 310.0995.

**Bis[2-(4-methoxy-4-oxobut-2-ynyloxy)naphthalen-1-yl]acetylene (6a).**

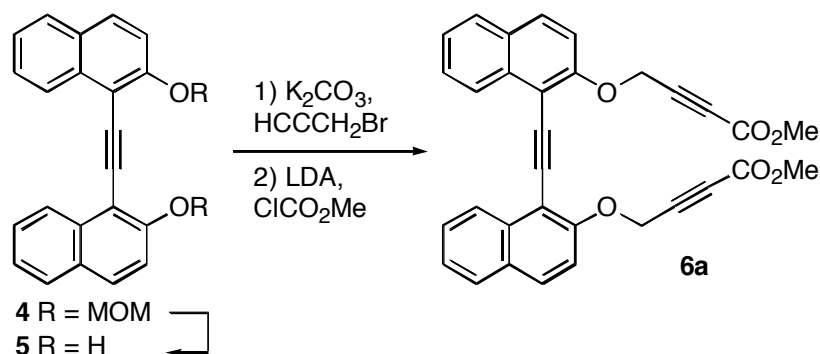

A solution of **4** (1.04 g, 2.60 mmol) in THF/H<sub>2</sub>O/conc HCl (6:2:1, 18 mL) was stirred at rt for 21 h. The reaction was quenched by the addition of water and extracted with CH<sub>2</sub>Cl<sub>2</sub>. The organic layer was washed with brine, dried over Na<sub>2</sub>SO<sub>4</sub>, and concentrated to afford crude alkyne **5** (0.732 g). To a stirred suspension of K<sub>2</sub>CO<sub>3</sub> (0.461 g, 3.34 mmol) in acetone (5 mL) was added the crude alkyne **5** (0.206 g) and propargyl bromide (0.242 g, 2.03 mmol) in acetone (10 mL), and the resulting mixture was stirred at rt for 88 h. The reaction mixture was quenched by the addition of water and extracted with EtOAc. The organic layer was washed with brine, dried over Na<sub>2</sub>SO<sub>4</sub>, and concentrated to afford crude bis[2-(prop-2-ynyloxy)naphthalen-1-yl]acetylene (0.244 g) as a pale yellow solid, a portion of which (0.115 g) was used in the next step without further purification.

<sup>1</sup>H NMR (CDCl<sub>3</sub>, 300 MHz) δ 8.71–8.61 (m, 2H), 7.90–7.77 (m, 4H), 7.68–7.56 (m, 2H), 7.50–7.35 (m, 4H), 5.06 (d, *J* = 2.4 Hz, 4H), 2.60 (t, *J* = 2.4 Hz, 2H).

A solution of LDA, prepared from *i*-Pr<sub>2</sub>NH (0.10 mL, 0.708 mmol), *n*-BuLi (0.45 mL, 1.52 M in hexane, 0.68 mmol), and THF (10 mL), was added dropwise to a stirred solution of the crude bis[2-(prop-2-ynyloxy)naphthalen-1-yl]acetylene (0.115 g) in THF (10 mL) at –78 °C, and the resulting mixture was stirred at –78 °C for 30 min. To the resulting solution was slowly added a solution of methyl chloroformate (0.096 mL, 1.24 mmol) in THF (10 mL) at –78 °C, and the resulting mixture was stirred at rt for 3 h. The reaction was quenched by the addition of water and extracted with EtOAc. The organic layer was washed with brine, dried over Na<sub>2</sub>SO<sub>4</sub>, and concentrated. The residue was purified on a silica gel column chromatography (hexane/EtOAc = 10:1), which furnished **6a** (0.087 g, 0.173 mmol, 50% yield from **4**) as a pale yellow solid.

Mp 197.0–198.5 °C; IR (KBr) 3038, 2954, 2906, 2854, 2246, 1711, 1510, 1434, 1262, 1044 cm<sup>-1</sup>; <sup>1</sup>H NMR (CDCl<sub>3</sub>, 300 MHz) δ 8.68–8.55 (m, 2H), 7.95–7.78 (m, 4H), 7.73–7.60

(m, 2H), 7.53–7.41 (m, 2H), 7.37 (d,  $J = 9.3$  Hz, 2H), 5.19 (s, 4H), 3.77 (s, 6H);  $^{13}\text{C}$  NMR ( $\text{CDCl}_3$ , 75 MHz)  $\delta$  156.7, 153.3, 134.3, 130.2, 129.5, 128.1, 127.7, 125.9, 125.1, 115.2, 109.2, 93.7, 82.2, 78.7, 57.7, 52.9; HRMS (FAB) calcd for  $\text{C}_{32}\text{H}_{22}\text{O}_6$   $[\text{M}]^+$  502.1416, found 502.1329.

**Bis[2-(4-*n*-butoxy-4-oxobut-2-ynyloxy)naphthalen-1-yl]acetylene (**6b**).**

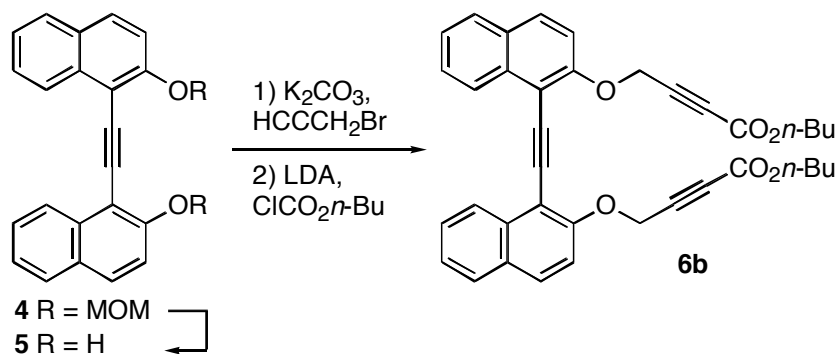

A solution of **4** (0.250 g, 0.627 mmol) in THF/ $\text{H}_2\text{O}$ /conc HCl (6:2:1, 9 mL) was stirred at rt for 15 h. The reaction was quenched by the addition of water and extracted with  $\text{CH}_2\text{Cl}_2$ . The organic layer was washed with brine, dried over  $\text{Na}_2\text{SO}_4$ , and concentrated to afford crude alkyne **5** (0.205 g). To a stirred suspension of  $\text{K}_2\text{CO}_3$  (0.467 g, 3.38 mmol) in acetone (5 mL) was added the crude alkyne **5** (0.205 g) and propargyl bromide (0.246 g, 2.06 mmol) in acetone (15 mL), and the resulting mixture was stirred at rt for 22 h. The reaction mixture was quenched by the addition of water and extracted with EtOAc. The organic layer was washed with brine, dried over  $\text{Na}_2\text{SO}_4$ , and concentrated to afford crude bis[2-(prop-2-ynyloxy)naphthalen-1-yl]acetylene (0.250 g). A solution of LDA, prepared from *i*- $\text{Pr}_2\text{NH}$  (0.22 mL, 1.56 mmol), *n*-BuLi (0.9 mL, 1.59 M in hexane, 1.43 mmol), and THF (10 mL), was added dropwise to a stirred solution of the crude bis[2-(prop-2-ynyloxy)naphthalen-1-yl]acetylene (0.250 g) in THF (20 mL) at  $-78^\circ\text{C}$ , and the resulting mixture was stirred at  $-78^\circ\text{C}$  for 20 min. To the resulting solution was slowly added with stirring a solution of *n*-butyl chloroformate (0.33 mL, 2.59 mmol) in THF (10 mL) at  $-78^\circ\text{C}$ , and the resulting mixture was stirred at rt for 18 h. The reaction was quenched by the addition of water and extracted with EtOAc three times. The organic layer was washed with brine, dried over  $\text{Na}_2\text{SO}_4$ , and concentrated. The residue was purified on a silica gel column chromatography (hexane/ $\text{CH}_2\text{Cl}_2$  = 2:1), which furnished **6b** (0.178 g, 0.303 mmol, 48% yield from **4**) as a pale yellow solid.

Mp  $129.5$ – $131.0^\circ\text{C}$ ; IR (KBr) 3050, 2957, 2247, 1706, 1257, 1053  $\text{cm}^{-1}$ ;  $^1\text{H}$  NMR ( $\text{CDCl}_3$ , 300 MHz)  $\delta$  8.63–8.58 (m, 2H), 7.93–7.80 (m, 4H), 7.72–7.63 (m, 2H), 7.52–7.42 (m, 2H), 7.37 (d,  $J = 9.3$  Hz, 2H), 5.18 (s, 4H), 4.18 (t,  $J = 6.6$  Hz, 4H), 1.64–1.57 (m, 4H), 1.44–1.29 (m, 4H), 0.91 (t,  $J = 7.5$  Hz, 6H);  $^{13}\text{C}$  NMR ( $\text{CDCl}_3$ , 75 MHz)  $\delta$  156.7, 153.1, 134.3, 130.1, 129.5, 128.1, 127.7, 125.9, 125.1, 115.2, 109.2, 93.7, 81.8, 79.1, 66.1, 57.7, 30.3, 19.0, 13.6; HRMS (FAB) calcd for  $\text{C}_{38}\text{H}_{34}\text{O}_6$   $[\text{M}]^+$  586.2355, found 586.2376.

**Bis[2-(hept-2-ynyloxy)naphthalen-1-yl]acetylene (**6c**).**

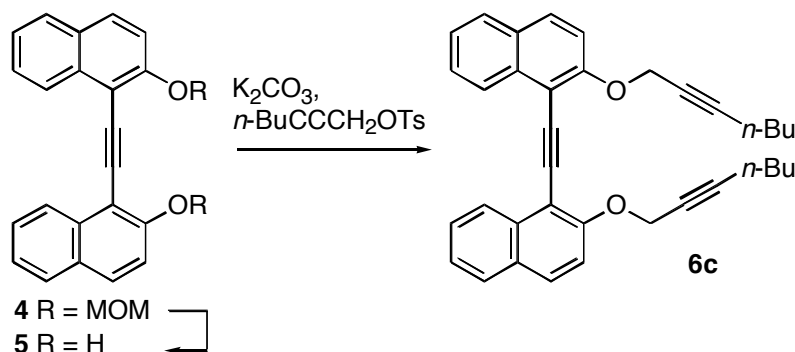

A solution of **4** (0.398 g, 1.00 mmol) in THF/H<sub>2</sub>O/conc HCl (6:2:1, 6 mL) was stirred at rt for 5 h. The reaction was quenched by the addition of water and extracted with CH<sub>2</sub>Cl<sub>2</sub>. The organic layer was washed with brine, dried over Na<sub>2</sub>SO<sub>4</sub>, and concentrated to afford crude alkyne **5** (0.394 g). To a stirred suspension of K<sub>2</sub>CO<sub>3</sub> (0.691 g, 5.00 mmol) in acetone (5 mL) was added the crude alkyne **5** (0.394 g) and 2-heptynyl tosylate<sup>2</sup> (0.666 g, 2.50 mmol) in acetone (25 mL), and the resulting mixture was stirred at rt for 21 h. The reaction mixture was extracted with EtOAc. The organic layer was washed with brine, dried over Na<sub>2</sub>SO<sub>4</sub>, and concentrated. The crude product was purified on a silica gel column chromatography (hexane/CH<sub>2</sub>Cl<sub>2</sub> = 4:1) to afford **6c** (0.147 g, 0.295 mmol, 30% yield from **4**) as a pale yellow solid.

Mp 86.5–87.5 °C; IR (KBr) 3055, 2955, 2925, 1587, 1507, 1278, 1255, 1219, 1043 cm<sup>-1</sup>; <sup>1</sup>H NMR (CDCl<sub>3</sub>, 300 MHz)  $\delta$  8.71–8.63 (m, 2H), 7.88–7.75 (m, 4H), 7.65–7.55 (m, 2H), 7.48–7.36 (m, 4H), 5.04 (t,  $J$  = 2.1 Hz, 4H), 2.23 (tt,  $J$  = 6.9 and 2.1 Hz, 4H), 1.58–1.25 (m, 8H), 0.85 (t,  $J$  = 7.5 Hz, 6H); <sup>13</sup>C NMR (CDCl<sub>3</sub>, 75 MHz)  $\delta$  157.4, 134.4, 129.5, 129.1, 127.9, 127.2, 126.1, 124.5, 115.6, 109.0, 93.8, 88.7, 75.2, 58.6, 30.5, 21.9, 18.6, 13.5; HRMS (FAB) calcd for C<sub>36</sub>H<sub>35</sub>O<sub>2</sub> [M+H]<sup>+</sup> 499.2637, found 499.2633.

**Bis[2-(4-methoxy-4-oxobut-2-ynyloxy)phenyl]acetylene (6d).**

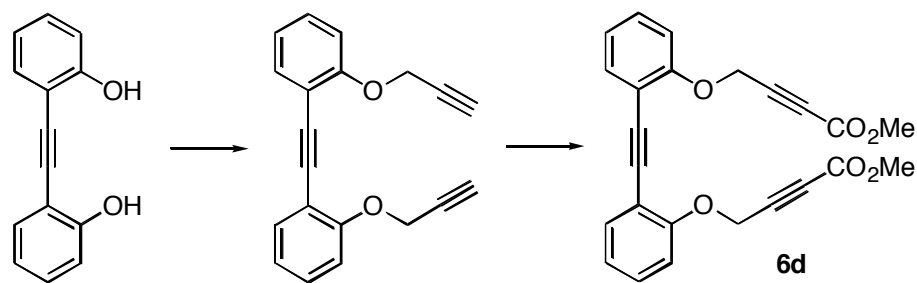

To a stirred suspension of NaH (55% in paraffin liquid, 0.124 g, 2.85 mmol) in DMF (5 mL) was added a solution of 2,2'-(1,2-ethynediyl)bisphenol<sup>3</sup> (0.270 g, 1.28 mmol) and propargyl bromide (0.460 g, 3.87 mmol) in DMF (20 mL) at 0 °C, and the resulting mixture was stirred at rt for 17 h. The reaction mixture was quenched by the addition of water and extracted with EtOAc. The organic layer was washed with brine, dried over Na<sub>2</sub>SO<sub>4</sub>, and concentrated. The residue was purified on a silica gel column chromatography

(hexane/EtOAc = 10:1), which furnished bis[2-(prop-2-ynyloxy)phenyl]acetylene (0.202 g, 0.705 mmol, 55% yield) as a pale yellow solid.

$^1\text{H}$  NMR ( $\text{CDCl}_3$ , 300 MHz)  $\delta$  7.61–7.47 (m, 2H), 7.39–7.20 (m, 2H), 7.16–6.91 (m, 4H), 4.86 (d,  $J$  = 2.1 Hz, 4H), 2.54 (t,  $J$  = 2.1 Hz, 2H).

A solution of LDA, prepared from *i*-Pr<sub>2</sub>NH (0.12 mL, 0.845 mmol), *n*-BuLi (0.49 mL, 1.58 M in hexane, 0.77 mmol), and THF (5 mL), was added dropwise to a stirred solution of bis[2-(prop-2-ynyloxy)phenyl]acetylene (0.100 g, 0.349 mmol) in THF (12 mL) at  $-78^\circ\text{C}$ , and the resulting mixture was stirred at  $-78^\circ\text{C}$  for 20 min. To the resulting solution was added a solution of methyl chloroformate (0.108 mL, 1.24 mmol) in THF (4 mL) at  $-78^\circ\text{C}$ , and the resulting mixture was gradually warmed to rt. The reaction was quenched by the addition of water and extracted with EtOAc. The organic layer was washed with brine, dried over Na<sub>2</sub>SO<sub>4</sub>, and concentrated. The residue was purified on a silica gel column chromatography (hexane/EtOAc = 4:1), which furnished **6d** (0.077 g, 0.191 mmol, 55% yield) as a pale yellow solid.

Mp 120.0–121.0  $^\circ\text{C}$ ; IR (KBr) 3059, 3001, 2953, 2925, 2850, 2252, 1715, 1504, 1442, 1380, 1263, 1230, 1017  $\text{cm}^{-1}$ ;  $^1\text{H}$  NMR ( $\text{CDCl}_3$ , 300 MHz)  $\delta$  7.59–7.48 (m, 2H), 7.38–7.24 (m, 2H), 7.10–6.94 (m, 4H), 4.99 (s, 4H), 3.77 (s, 6H);  $^{13}\text{C}$  NMR ( $\text{CDCl}_3$ , 75 MHz)  $\delta$  157.6, 153.3, 133.7, 129.7, 122.2, 113.85, 113.78, 89.8, 82.2, 78.6, 56.6, 52.8; HRMS (FAB) calcd for C<sub>24</sub>H<sub>18</sub>O<sub>6</sub> [M]<sup>+</sup> 402.1103, found 402.1115; HRMS (ESI) calcd for C<sub>24</sub>H<sub>18</sub>O<sub>6</sub>Na [M+Na]<sup>+</sup> 425.1001, found 425.0994.

### III. Rh-Catalyzed Cycloadditions of Triynes

**General Procedure for Rh(I)<sup>+</sup>/(*R,R*)-Me-Duphos-Catalyzed Cycloaddition of Triynes (Tbele 1, entry 1, **6a**).** Under an Ar atmosphere, (*R,R*)-MeDuphos (6.1 mg, 0.02 mmol) and [Rh(cod)<sub>2</sub>]BF<sub>4</sub> (8.1 mg, 0.02 mmol) were dissolved in CH<sub>2</sub>Cl<sub>2</sub> (1.0 mL) and the mixture was stirred for 5 min. H<sub>2</sub> was introduced to the resulting solution in a Schlenk tube. After stirring at rt for 1 h, the resulting mixture was concentrated to dryness. To a CH<sub>2</sub>Cl<sub>2</sub> (1.0 mL) solution of the residue was added a CH<sub>2</sub>Cl<sub>2</sub> (3.0 mL) solution of **6a** (50.3 mg, 0.10 mmol) and washed the remaining substrate away by using CH<sub>2</sub>Cl<sub>2</sub> (1.0 mL). The mixture was stirred at rt for 15 h. The resulting mixture was concentrated and purified on a preparative TLC (hexane/EtOAc/CH<sub>2</sub>Cl<sub>2</sub> = 10:1:1), which furnished **7a** (40.3 mg, 0.0802 mmol, 80% yield, 71% ee) as a yellow solid.

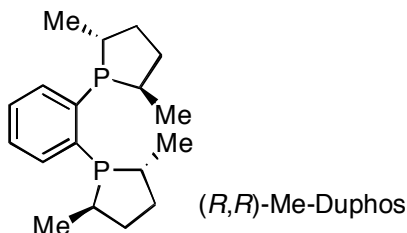

**(*M*)-(-)-Dimethyl 8*H*,11*H*-naphtho[2,1-*b*]naphtho[1'',2'':5',6']pyrano[3',4':5,6]-benzo[*d*]pyran-9,10-dicarboxylate [(*M*)-(-)-**7a**].**

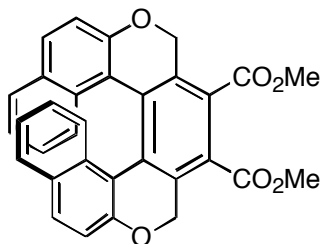

Mp 191.0–192.0 °C;  $[\alpha]_D^{25} -908.6^\circ$  (CHCl<sub>3</sub>, *c*1.49, 71% ee); IR (KBr) 3060, 2952, 2924, 2851, 1720, 1230, 1207, 1000 cm<sup>-1</sup>; <sup>1</sup>H NMR (CDCl<sub>3</sub>, 300 MHz)  $\delta$  7.45 (d, *J* = 9.0 Hz, 2H), 7.26 (d, *J* = 9.0 Hz, 2H), 7.23–7.14 (m, 2H), 6.87–6.71 (m, 4H), 6.64–6.53 (m, 2H), 5.54 (d, *J* = 14.1 Hz, 2H), 4.89 (d, *J* = 14.1 Hz, 2H), 3.98 (s, 6H); <sup>13</sup>C NMR (CDCl<sub>3</sub>, 75 MHz)  $\delta$  167.3, 156.1, 137.9, 131.3, 129.6, 129.3, 128.6, 127.1, 126.3, 125.1, 123.2, 121.9, 118.4, 117.6, 67.9, 52.8; HRMS (FAB) calcd for C<sub>32</sub>H<sub>23</sub>O<sub>6</sub> [M+H]<sup>+</sup> 503.1495, found 503.1472; CHIRALPAK AD, Hexane/*i*-PrOH = 80:20, 1.0 mL/min, retention times: 9.7 min (minor isomer) and 15.2 min (major isomer).

**(–)-Di-*n*-butyl 8*H*,11*H*-naphtho[2,1-*b*]naphtho[1'',2'':5',6']pyrano[3',4':5,6]benzo[*d*]pyran-9,10-dicarboxylate [(–)-7b].**

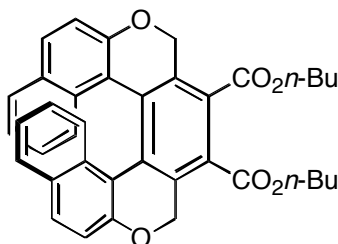

Yellow solid; Mp 50.0–51.0 °C;  $[\alpha]_D^{25} -845.8^\circ$  (CHCl<sub>3</sub>, *c*1.31, 77% ee); IR (KBr) 2957, 2926, 2853, 1722, 1231, 1195 cm<sup>-1</sup>; <sup>1</sup>H NMR (CDCl<sub>3</sub>, 300 MHz)  $\delta$  7.44 (d, *J* = 8.7 Hz, 2H), 7.30–7.22 (m, 2H), 7.22–7.14 (m, 2H), 6.86–6.71 (m, 4H), 6.63–6.52 (m, 2H), 5.54 (d, *J* = 14.1 Hz, 2H), 4.89 (d, *J* = 14.1 Hz, 2H), 4.46 (dt, *J* = 10.8 and 6.6 Hz, 2H), 4.30 (dt, *J* = 10.8 and 6.6 Hz, 2H), 1.84–1.69 (m, 4H), 1.57–1.40 (m, 4H), 0.99 (t, *J* = 7.5 Hz, 6H); <sup>13</sup>C NMR (CDCl<sub>3</sub>, 75 MHz)  $\delta$  167.0, 156.0, 137.7, 131.2, 129.4, 129.3, 128.6, 127.0, 126.7, 125.1, 123.2, 122.0, 118.4, 117.5, 68.0, 66.0, 30.6, 19.3, 13.7; HRMS (FAB) calcd for C<sub>38</sub>H<sub>34</sub>O<sub>6</sub> [M]<sup>+</sup> 586.2355, found 586.2386; CHIRALPAK AD, Hexane/*i*-PrOH 80:20, 1.0 mL/min, retention times: 8.1 min (minor isomer) and 25.2 min (major isomer).

**(–)-8*H*,11*H*-9,10-Di-*n*-butylnaphtho[2,1-*b*]naphtho[1'',2'':5',6']pyrano[3',4':5,6]-benzo[*d*]pyran [(–)-7c].**

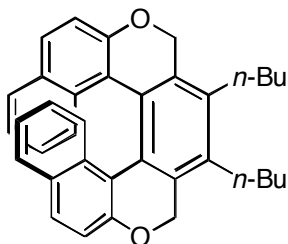

Pale yellow solid; Mp 135.5–136.1 °C;  $[\alpha]_D^{25} -604.0^\circ$  ( $\text{CHCl}_3$ ,  $c$  1.73, 85% ee); IR (KBr) 3056, 2956, 2925, 2852, 1227, 809  $\text{cm}^{-1}$ ;  $^1\text{H}$  NMR ( $\text{CDCl}_3$ , 300 MHz)  $\delta$  7.40 (d,  $J$  = 8.7 Hz, 2H), 7.26 (d,  $J$  = 8.7 Hz, 2H), 7.22–7.14 (m, 2H), 6.95–6.87 (m, 2H), 6.82–6.72 (m, 2H), 6.58–6.47 (m, 2H), 5.52 (d,  $J$  = 12.9 Hz, 2H), 4.71 (d,  $J$  = 12.9 Hz, 2H), 2.77 (t,  $J$  = 7.8 Hz, 4H), 1.75–1.46 (m, 8H), 1.04 (t,  $J$  = 7.2 Hz, 6H);  $^{13}\text{C}$  NMR ( $\text{CDCl}_3$ , 75 MHz)  $\delta$  154.9, 136.1, 134.5, 129.40, 129.37, 129.2, 126.7, 125.0, 124.3, 122.73, 122.71, 119.9, 117.5, 67.7, 33.5, 28.7, 23.2, 14.0; HRMS (FAB) calcd for  $\text{C}_{36}\text{H}_{34}\text{O}_2$   $[\text{M}]^+$  498.2559, found 498.2527; CHIRALPAK AD-H, Hexane/*i*-PrOH = 98:2, 1.0 mL/min, retention times: 6.0 min (major isomer) and 6.8 min (minor isomer).

**8*H*,17*H*-9,18-Di-*n*-butyl-naphtho[2,1-*b*]naphtho[1'',2'':5',6']pyrano[3',4':5,4]benzo[*d*]pyran (8c).**

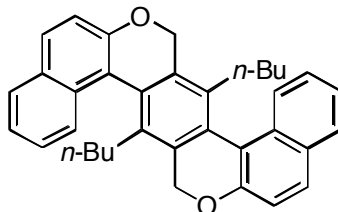

Pale yellow greasy solid; IR (KBr) 3059, 2925, 2854, 1464, 1377, 1230, 1011, 816  $\text{cm}^{-1}$ ;  $^1\text{H}$  NMR ( $\text{CDCl}_3$ , 300 MHz)  $\delta$  7.87–7.75 (m, 6H), 7.46–7.33 (m, 6H), 5.47 (d,  $J$  = 12.9 Hz, 2H), 4.76 (d,  $J$  = 12.9 Hz, 2H), 2.79–2.54 (m, 4H), 1.22–0.60 (m, 8H), 0.49 (t,  $J$  = 7.2 Hz, 6H);  $^{13}\text{C}$  NMR ( $\text{CDCl}_3$ , 100 MHz)  $\delta$  155.8, 136.1, 132.6, 130.4, 130.0, 129.2, 128.32, 128.30, 125.9, 125.7, 123.7, 119.9, 117.9, 68.4, 32.9, 29.9, 22.0, 13.5; HRMS (FAB) calcd for  $\text{C}_{36}\text{H}_{34}\text{O}_2$   $[\text{M}]^+$  498.2559, found 498.2538.

**General Procedure for Rh(I)<sup>+</sup>/(*S*)-xyl-Segphos-Catalyzed Cycloaddition of Triynes (Table 1, entry 4, 6a).** Under an Ar atmosphere, (*S*)-xyl-Segphos (14.5 mg, 0.02 mmol) and  $[\text{Rh}(\text{cod})_2]\text{BF}_4$  (8.1 mg, 0.02 mmol) were dissolved in  $\text{CH}_2\text{Cl}_2$  (1.0 mL) and the mixture was stirred for 5 min.  $\text{H}_2$  was introduced to the resulting solution in a Schlenk tube. After stirring at rt for 1 h, the resulting mixture was concentrated to dryness. To the ( $\text{CH}_2\text{Cl}_2$ )<sub>2</sub> (1.0 mL) solution of the residue was added a ( $\text{CH}_2\text{Cl}_2$ )<sub>2</sub> (3.0 mL) solution of **6a** (50.3 mg, 0.10 mmol) and washed the remaining substrate away by using ( $\text{CH}_2\text{Cl}_2$ )<sub>2</sub> (1.0 mL). The mixture was stirred at 80 °C for 15 h. The resulting mixture was concentrated and purified on a preparative TLC (hexane/EtOAc = 5:1), which furnished **7a** (19.4 mg, 0.0386 mmol, 39% yield) as a pale yellow solid and **8a** (17.1 mg, 0.0340 mmol, 34% yield) as a yellow solid.



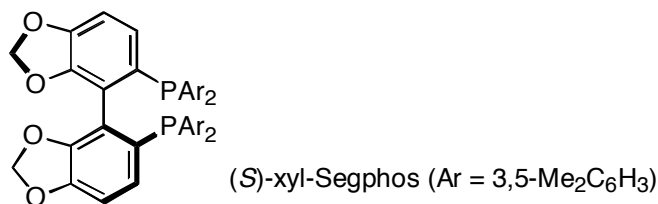

**Dimethyl 8*H*,17*H*-naphtho[2,1-*b*]naphtho[1'',2'':5',6']pyrano[3',4':5,4]benzo-[*d*]pyran-9,18-dicarboxylate (8a).**

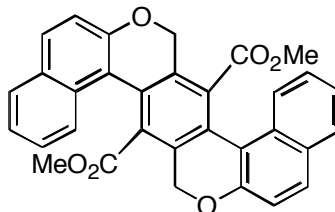

Mp 250.0–251.2 °C; IR (KBr) 2947, 2925, 2851, 1717, 1305, 1169 cm<sup>-1</sup>; <sup>1</sup>H NMR (CDCl<sub>3</sub>, 300 MHz) δ 7.95–7.74 (m, 6H), 7.53–7.27 (m, 6H), 5.49 (d, *J* = 13.8 Hz, 2H), 4.96 (d, *J* = 13.8 Hz, 2H), 2.99 (s, 6H); <sup>13</sup>C NMR (CDCl<sub>3</sub>, 75 MHz) δ 167.5, 155.4, 137.0, 130.9, 130.8, 129.7, 129.0, 128.6, 128.3, 126.9, 124.2, 123.3, 117.9, 117.7, 68.1, 52.0; HRMS (FAB) calcd for C<sub>32</sub>H<sub>22</sub>O<sub>6</sub> [M]<sup>+</sup> 502.1416, found 502.1432; HRMS (ESI) calcd for C<sub>32</sub>H<sub>22</sub>O<sub>6</sub>Na [M+Na]<sup>+</sup> 525.1314, found 525.1314.

**Di-*n*-butyl 8*H*,17*H*-naphtho[2,1-*b*]naphtho[1'',2'':5',6']pyrano[3',4':5,4]benzo-[*d*]pyran-9,18-dicarboxylate (8b).**

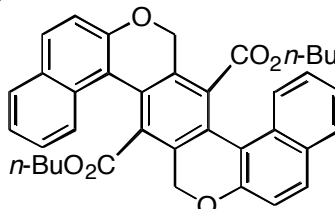

Small amount of pure ladder-type molecule **8b** (4.4 mg) could be separated from helicen-like molecule **7b** by silica gel column chromatography (hexane/EtOAc = 10:1) as the first fraction. Yellow solid; Mp 54.3–55.8 °C; IR (KBr) 3060, 2956, 2925, 2854, 1712, 1302, 1248, 1176, 1124, 1020 cm<sup>-1</sup>; <sup>1</sup>H NMR (CDCl<sub>3</sub>, 300 MHz) δ 7.96–7.89 (m, 2H), 7.87–7.77 (m, 4H), 7.50–7.43 (m, 2H), 7.43–7.36 (m, 2H), 7.32 (d, *J* = 9.0 Hz, 2H), 5.51 (d, *J* = 13.8 Hz, 2H), 4.97 (d, *J* = 13.8 Hz, 2H), 3.71 (dt, *J* = 10.8 and 6.3 Hz, 2H), 3.04 (dt, *J* = 10.8 and 6.3 Hz, 2H), 0.98–0.70 (m, 8H), 0.64 (t, *J* = 6.6 Hz, 6H); <sup>13</sup>C NMR (CDCl<sub>3</sub>, 100 MHz) δ 167.3, 155.4, 137.0, 130.9, 130.6, 129.9, 129.4, 128.5, 128.2, 126.9, 124.2, 123.5, 118.0, 117.8, 68.2, 65.5, 29.6, 18.7, 13.6; HRMS (FAB) calcd for C<sub>38</sub>H<sub>34</sub>O<sub>6</sub> [M]<sup>+</sup> 586.2355, found 586.2360.

**Dimethyl 6*H*,9*H*-chromeno[3',4':4,3]benzo[*c*]chromene-7,8-dicarboxylate (7d).**

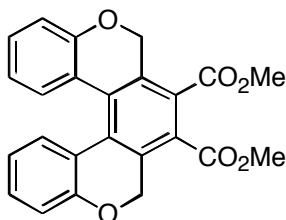

The reaction was conducted in  $\text{CH}_2\text{Cl}_2$  at 40 °C for 14 h. Pale yellow solid; Mp 227.5–228.1 °C; IR (KBr) 2949, 1726, 1229, 1202,  $\text{cm}^{-1}$ ;  $^1\text{H}$  NMR ( $\text{CDCl}_3$ , 300 MHz)  $\delta$  7.35–7.28 (m, 2H), 7.28–7.18 (m, 2H), 7.14–7.04 (m, 2H), 6.83–6.72 (m, 2H), 5.64–4.50 (br, 4H), 3.90 (s, 6H);  $^{13}\text{C}$  NMR ( $\text{CDCl}_3$ , 75 MHz)  $\delta$  167.0, 156.5, 137.2, 130.34, 130.28, 129.0, 126.9, 122.8, 121.6, 117.9, 67.7, 52.7; HRMS (FAB) calcd for  $\text{C}_{24}\text{H}_{19}\text{O}_6$   $[\text{M}+\text{H}]^+$  403.1182, found 403.1210; HRMS (ESI) calcd for  $\text{C}_{24}\text{H}_{18}\text{O}_6\text{Na}$   $[\text{M}+\text{Na}]^+$  425.1001, found 425.0987.

**Dimethyl 6H,13H-chromeno[3',4':4,5]benzo[c]chromene-7,14-dicarboxylate (8d).**

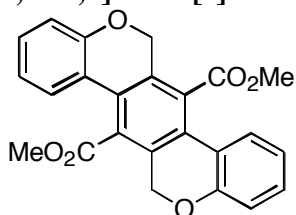

The reaction was conducted in  $\text{CH}_2\text{Cl}_2$  at 40 °C for 14 h. Pale yellow solid; Mp 186.0–187.5 °C; IR (neat) 2953, 2925, 2852, 1726, 1261, 1227, 1043, 1018  $\text{cm}^{-1}$ ;  $^1\text{H}$  NMR ( $\text{CDCl}_3$ , 300 MHz)  $\delta$  7.40–7.19 (m, 4H), 7.13–6.99 (m, 4H), 5.02 (s, 4H), 3.85 (s, 6H);  $^{13}\text{C}$  NMR ( $\text{CDCl}_3$ , 75 MHz)  $\delta$  169.2, 155.9, 133.2, 130.4, 127.7, 127.5, 125.7, 122.3, 122.1, 117.7, 66.8, 52.7; HRMS (FAB) calcd for  $\text{C}_{24}\text{H}_{19}\text{O}_6$   $[\text{M}+\text{H}]^+$  403.1182, found 403.1153; HRMS (ESI) calcd for  $\text{C}_{24}\text{H}_{18}\text{O}_6\text{Na}$   $[\text{M}+\text{Na}]^+$  425.1001, found 425.1005.

**(+)-5,6-Bis(2-hydroxynaphthalen-1-yl)-1,3-dihydroisobenzofuran-4,7-dicarboxylic acid diethyl ester [(+)-10].** Under an Ar atmosphere, (*R*)-tol-BINAP (4.7 mg, 0.0075 mmol) and  $[\text{Rh}(\text{cod})_2]\text{BF}_4$  (3.0 mg, 0.0075 mmol) were dissolved in  $\text{CH}_2\text{Cl}_2$  (1.0 mL) and the mixture was stirred at rt for 5 min.  $\text{H}_2$  was introduced to the resulting solution in a Schlenk tube. After stirring at rt for 1 h, the resulting solution was concentrated and dissolved in THF (0.3 mL). To this solution was added a THF (0.4 mL) solution of **5** (93.0 mg, 0.30 mmol) at rt, and then a THF (1.3 mL) solution of bis[3-(ethoxycarbonyl)propargyl] ether<sup>4</sup> (**9**, 35.7 mg, 0.15 mmol) dropwise over 30 min at rt. After stirring at rt for 1 h, the resulting solution was concentrated and purified on a preparative TLC (hexane/EtOAc = 2:1), which furnished **10** (18.9 mg, 0.034 mmol, 23% yield, 69% ee) as a pale yellow solid.

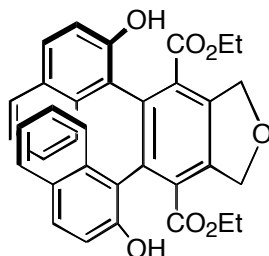

Mp 219.0–220.0 °C;  $[\alpha]_D^{25} +121.8^\circ$  ( $\text{CHCl}_3$ ,  $c$ 0.280, 69% ee); IR (KBr) 3435, 3057, 2979, 2961, 2926, 2856, 1704, 1257, 1184–1092(br), 1023  $\text{cm}^{-1}$ ;  $^1\text{H}$  NMR ( $\text{CDCl}_3$ , 300 MHz)  $\delta$  7.66–7.55 (m, 2H), 7.48–7.35 (m, 4H), 7.35–7.17 (m, 4H), 6.58 (d,  $J$  = 8.7 Hz, 2H), 5.63–5.47 (m, 2H), 5.47–5.33 (m, 2H), 4.64 (s, 2H), 3.78 (q,  $J$  = 7.2 Hz, 4H), 0.53 (t,  $J$  = 7.2 Hz, 6H);  $^{13}\text{C}$  NMR ( $\text{CDCl}_3$ , 75 MHz)  $\delta$  166.3, 150.5, 142.1 137.0, 133.5, 131.5, 129.3, 128.4, 127.8, 126.1, 124.4, 123.1, 118.5, 117.3, 74.1, 61.2, 13.0; HRMS (FAB) calcd for  $\text{C}_{34}\text{H}_{28}\text{O}_7$   $[\text{M}]^+$  548.1835, found 548.1785; CHIRALCEL OD-H (Connected two columns were employed.), Hexane/*i*-PrOH = 85:15, 0.5 mL/min, retention times: 27.3 min (minor isomer) and 31.4 min (major isomer).

#### IV. References

- (1) Cironi, P.; Albericio, F.; Alvarez, M. *Tetrahedron Lett.* **2004**, *45*, 7311.
- (2) Baldwin, J. E.; Adlington, R. M.; Crouch, N. P.; Hill, R. L.; Laffey, T. G. *Tetrahedron Lett.* **1995**, *36*, 7925.
- (3) Hiroya, K.; Suzuki, N.; Yasuhara, A.; Egawa, Y.; Kasano, A.; Sakamoto, T. *J. Chem. Soc., Perkin Trans. 1* **2000**, 4339.
- (4) Yamamoto, Y.; Nagata, A.; Nagata, H.; Ando, Y.; Arikawa, Y.; Tatsumi, K.; Itoh, K. *Chem.–Eur. J.* **2003**, *9*, 2469.

Bis(2-hydroxynaphthalen-1-yl)acetylene (**5**)

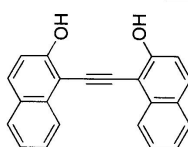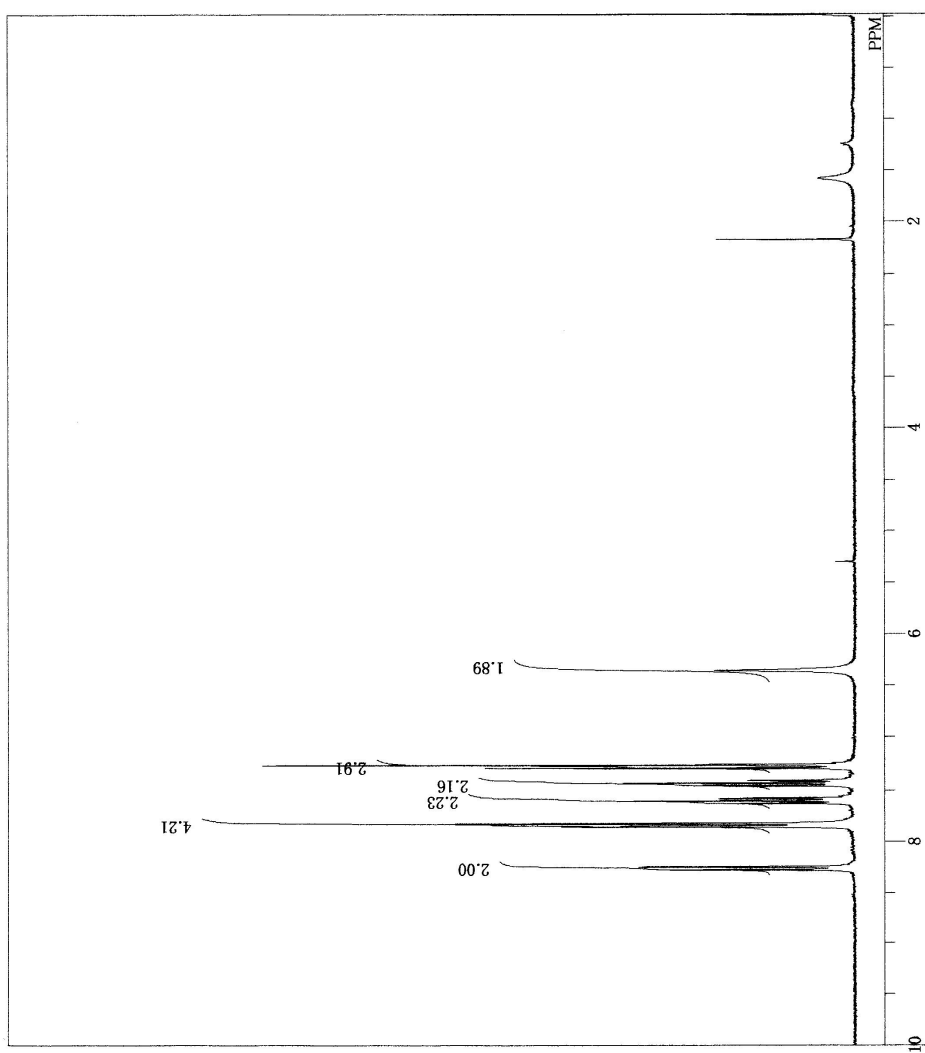

Bis[2-(4-methoxy-4-oxobut-2-ynyloxy)naphthalen-1-yl]acetylene (**6a**)

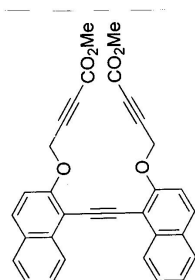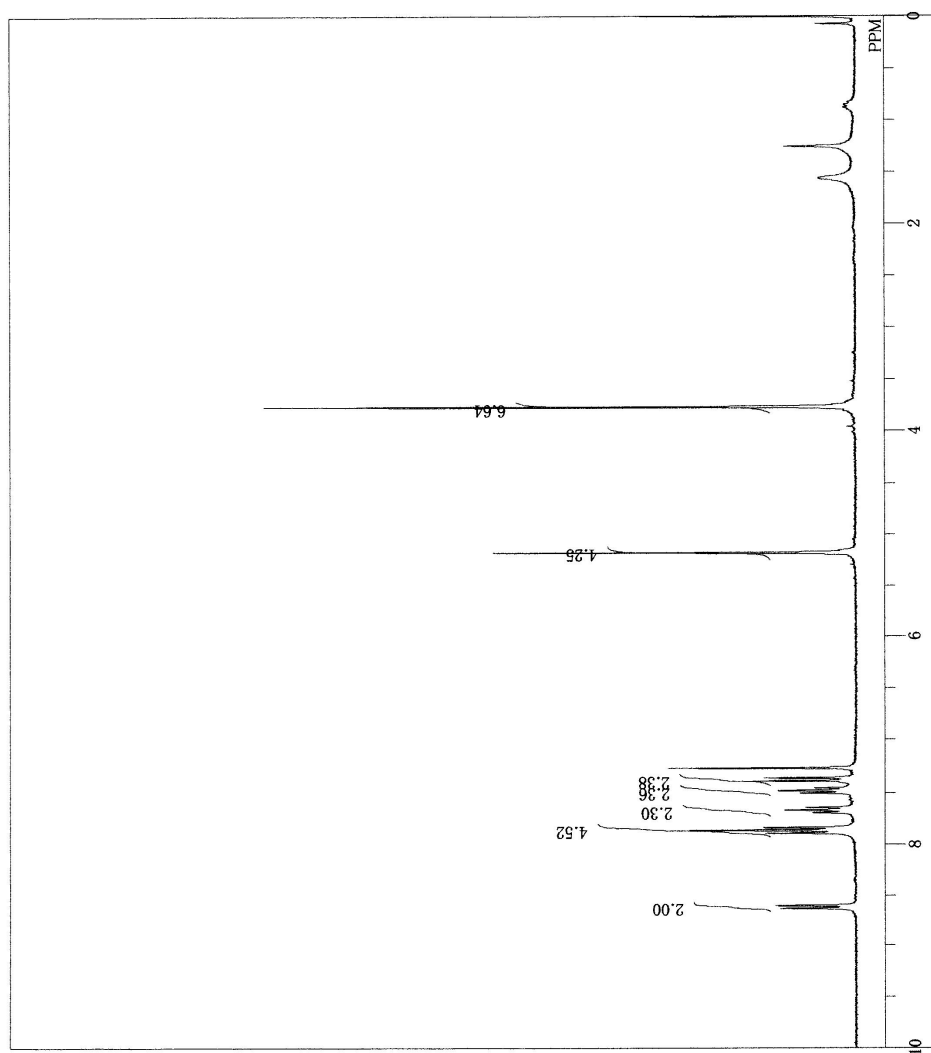

Bis[2-(4-*n*-butoxy-4-oxobut-2-ynyloxy)naphthalen-1-yl]acetylene (**6b**)

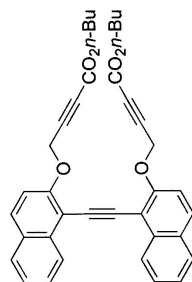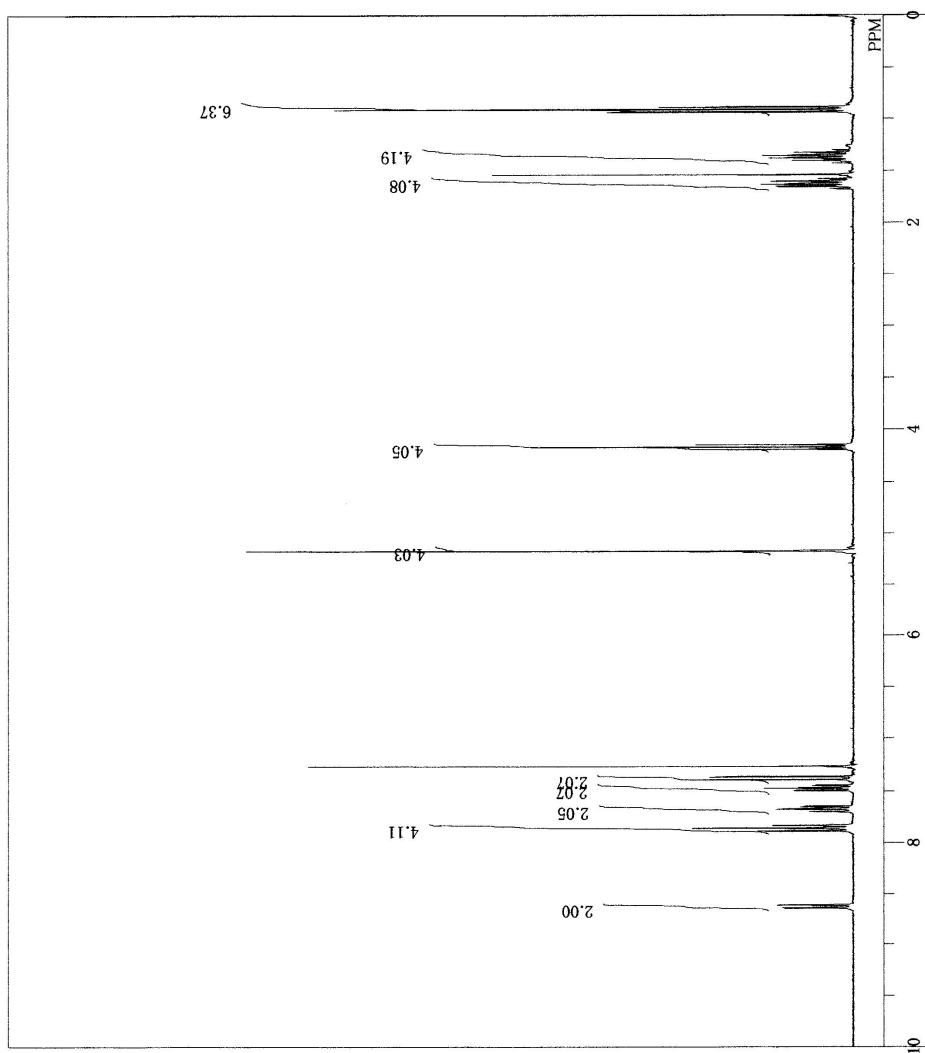

Bis[2-(hept-2-ynyloxy)naphthalen-1-yl]acetylene (**6c**)

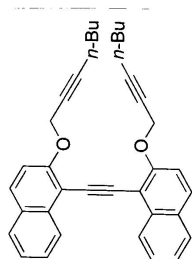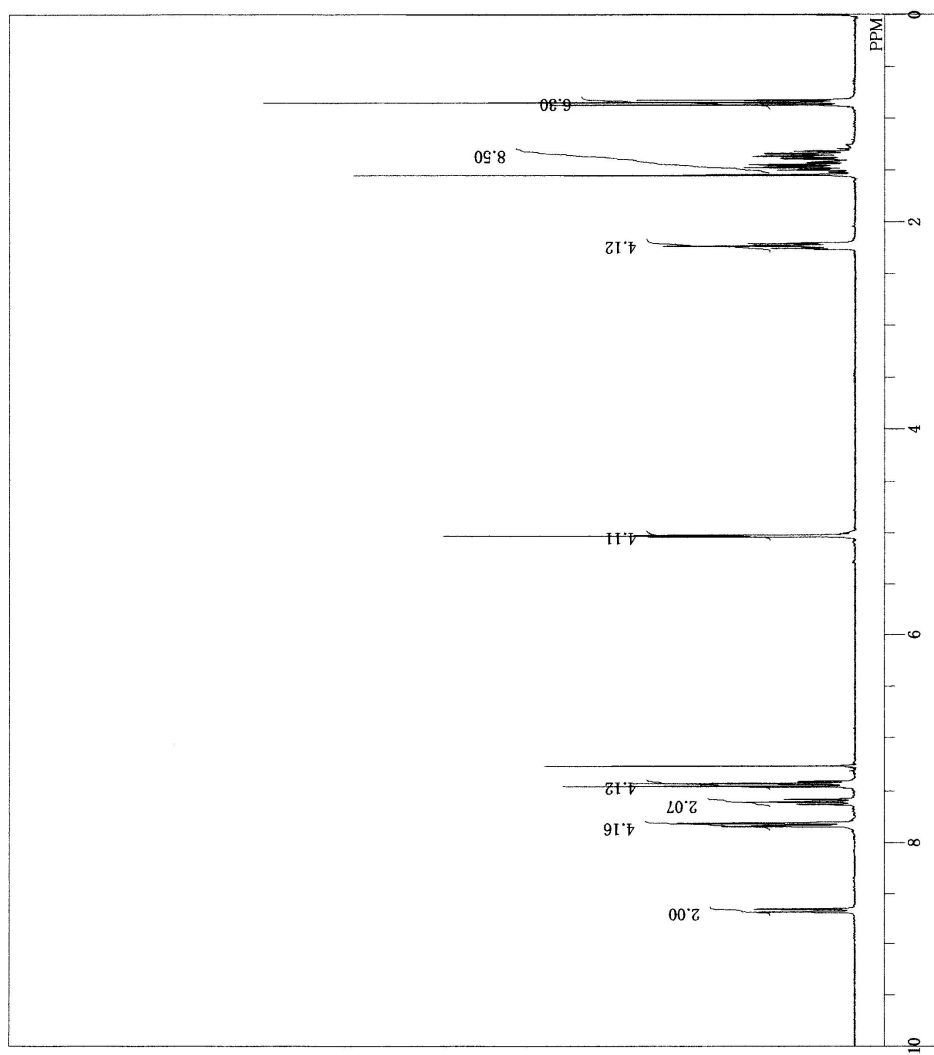

Bis[2-(4-methoxy-4-oxobut-2-ynyloxy)phenyl]acetylene (**6d**)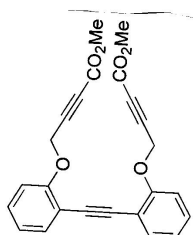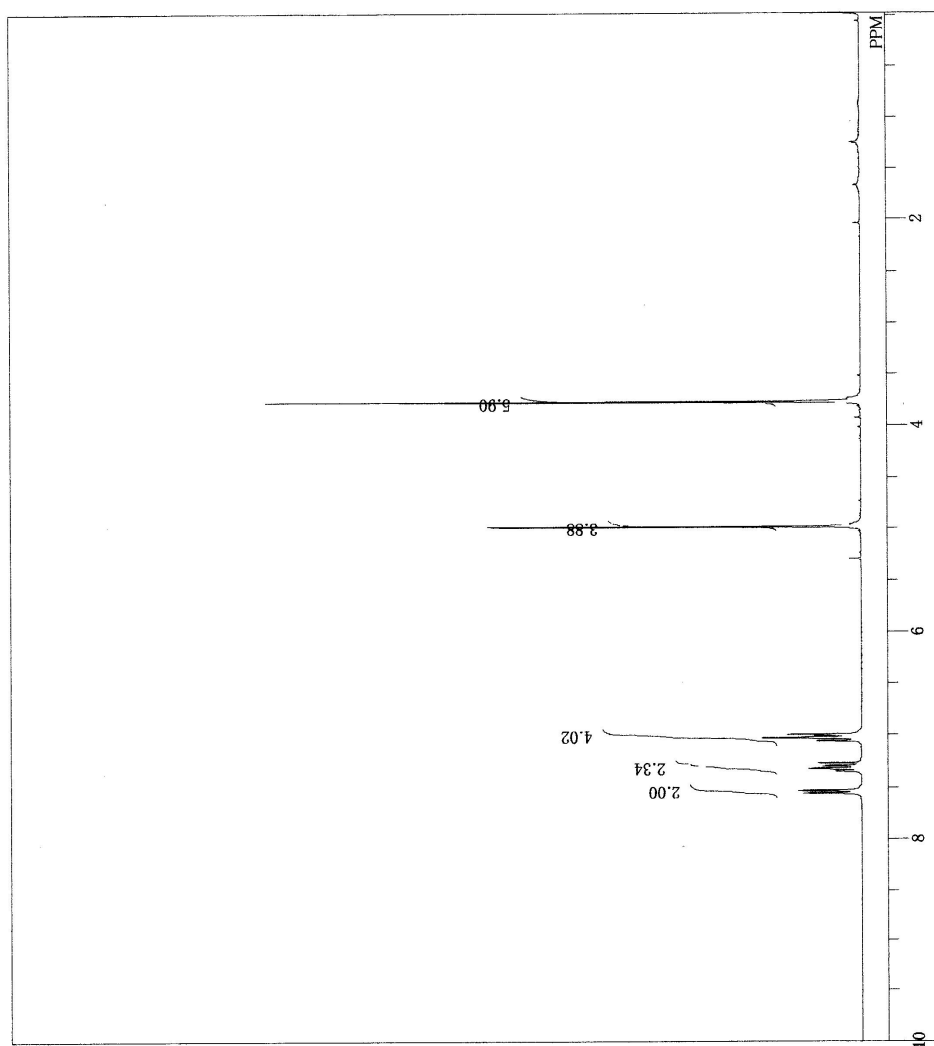



Dimethyl 8*H*,11*H*-naphtho[2,1-*b*]naphtho[1'',2'':5',6']pyrano[3',4':5,6]benzo[*d*]pyran-9,10-dicarboxylate (**7a**)

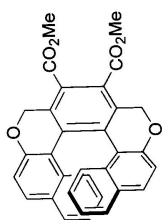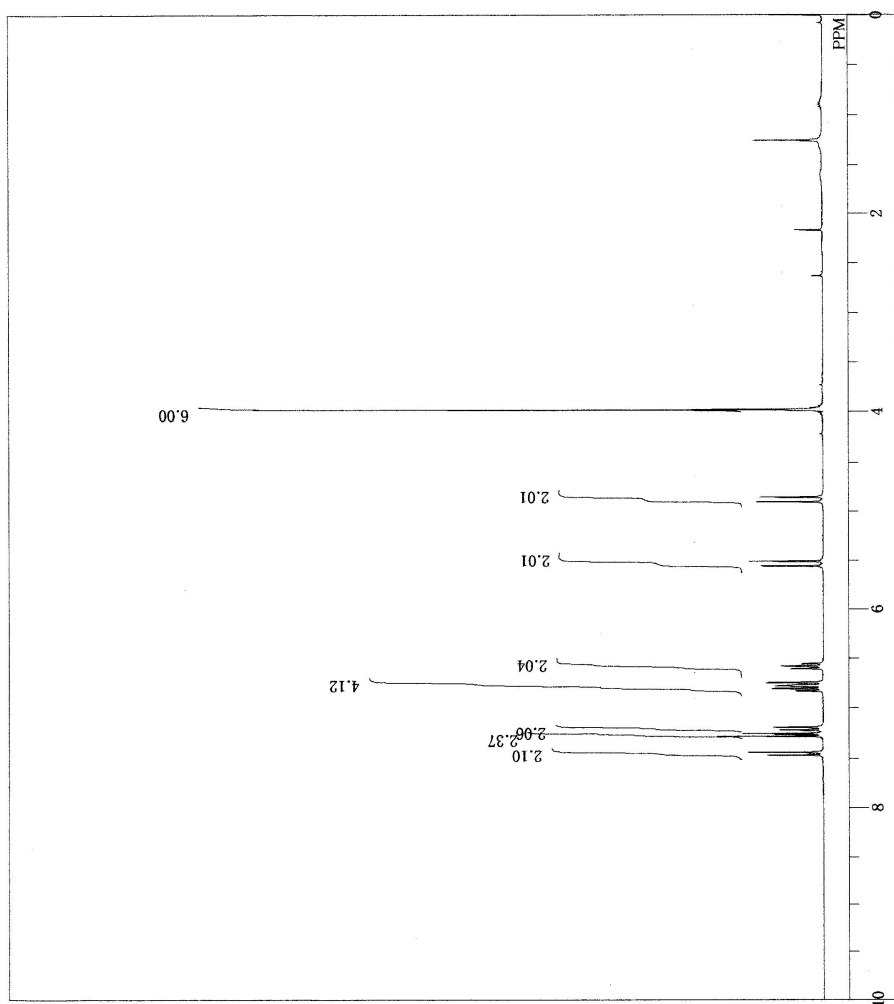

Di-*n*-butyl 8*H*,11*H*-naphtho[2,1-*b*]naphtho[1'',2'':5',6']pyrano[3',4':5,6]benzo[*d*]pyran-9,10-dicarboxylate (**7b**)

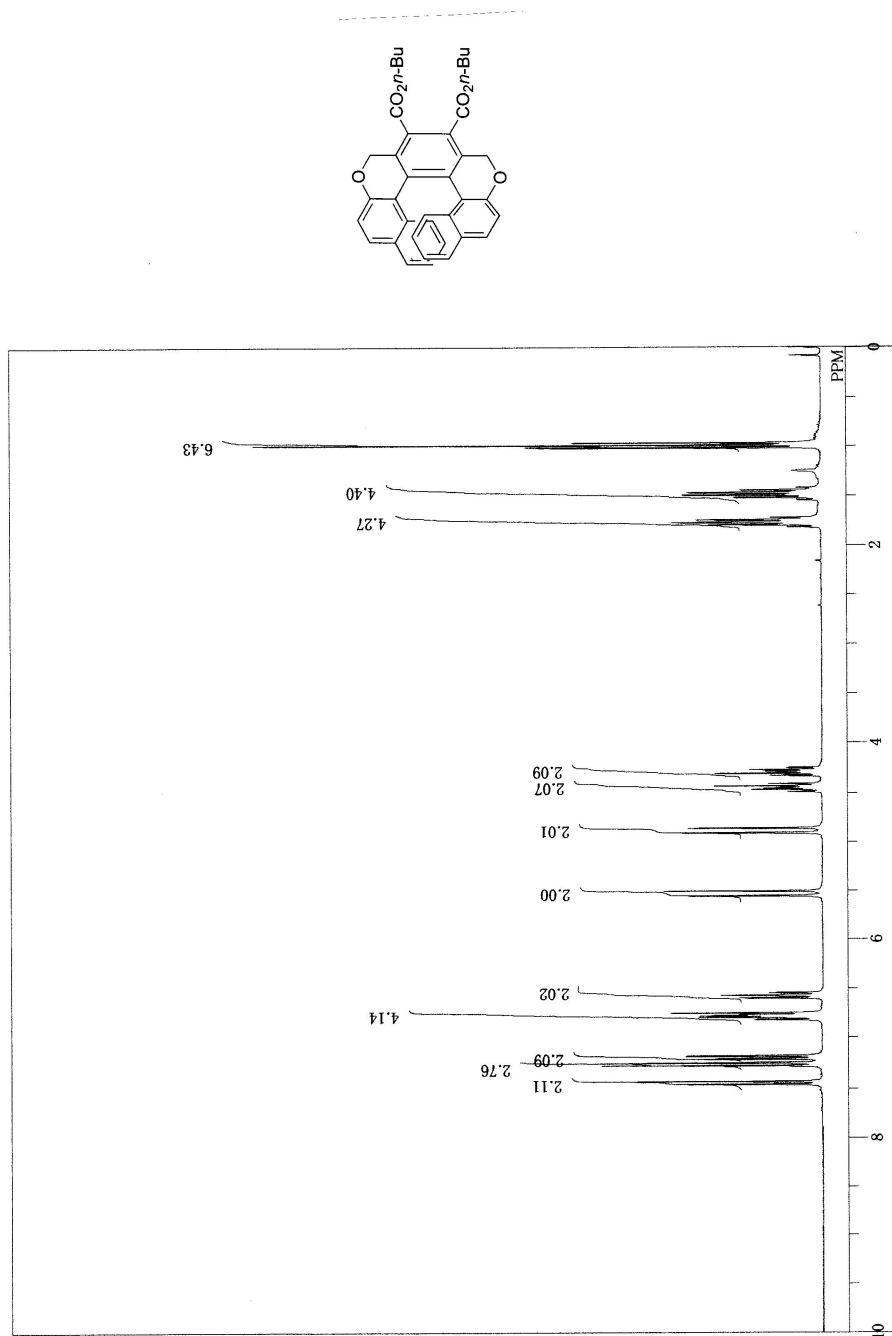

8*H*,11*H*-9,10-Di-*n*-butylnaphtho[2,1-*b*]naphtho[1'',2'':5',6']pyrano[3',4':5,6]benzo[*d*]pyran  
(7c)

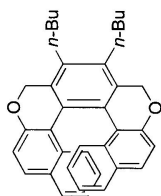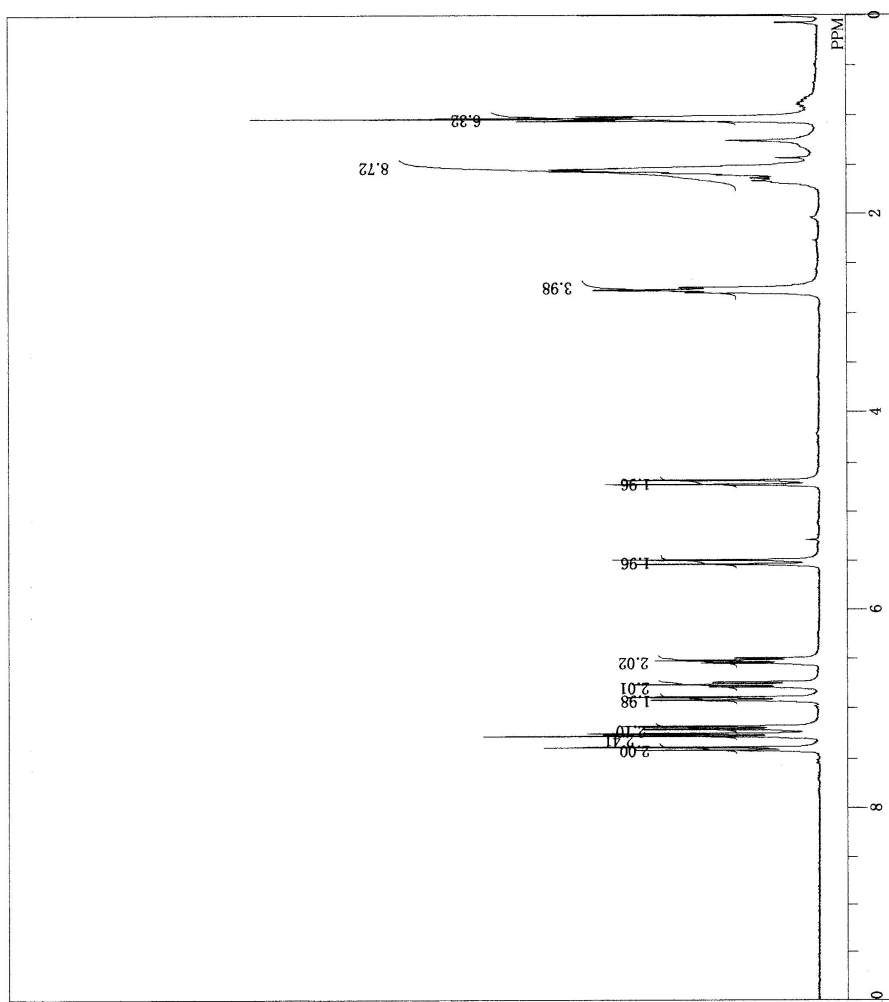

Dimethyl 6*H*,9*H*-chromeno[3',4':4,3]benzo[*c*]chromene-7,8-dicarboxylate (**7d**)

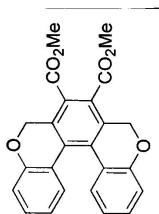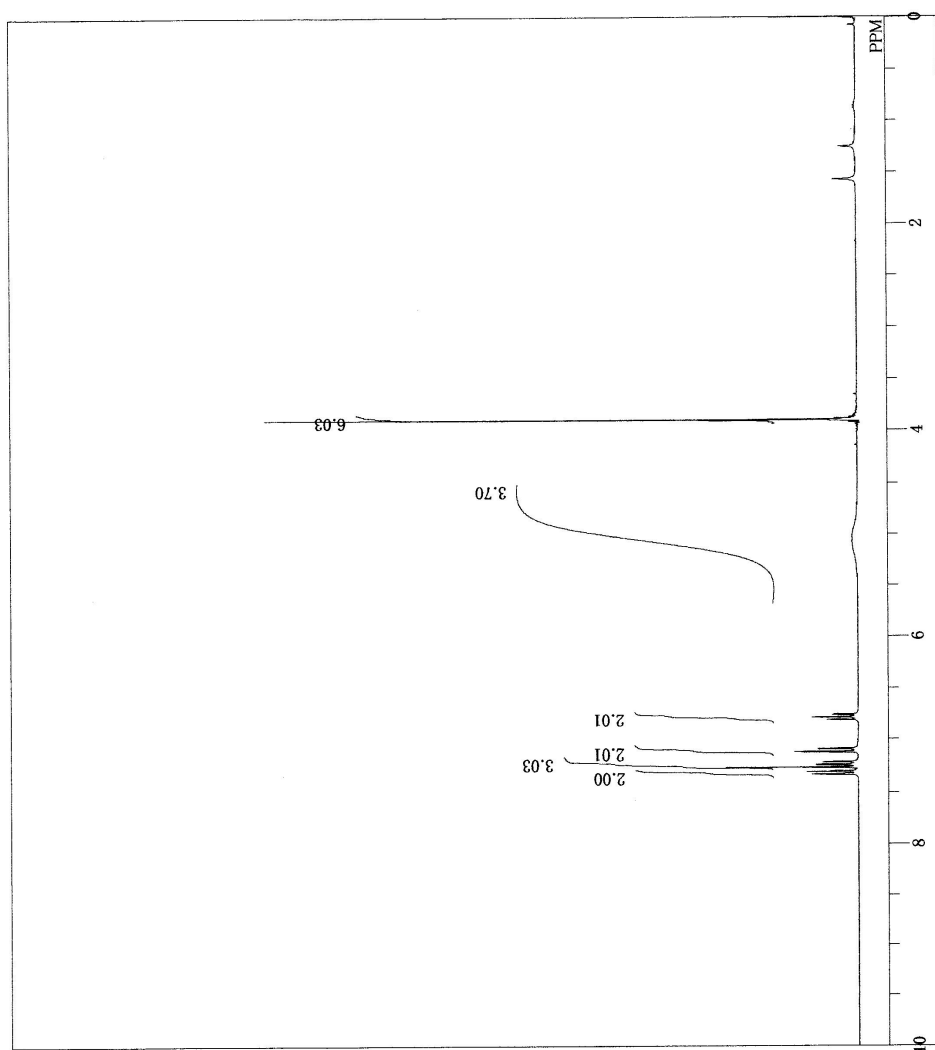

Dimethyl 8*H*,17*H*-naphtho[2,1-*b*]naphtho[1'',2'':5',6']pyrano[3',4':5,4]benzo[*d*]pyran-9,18-dicarboxylate (**8a**)

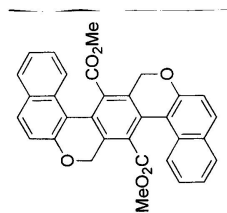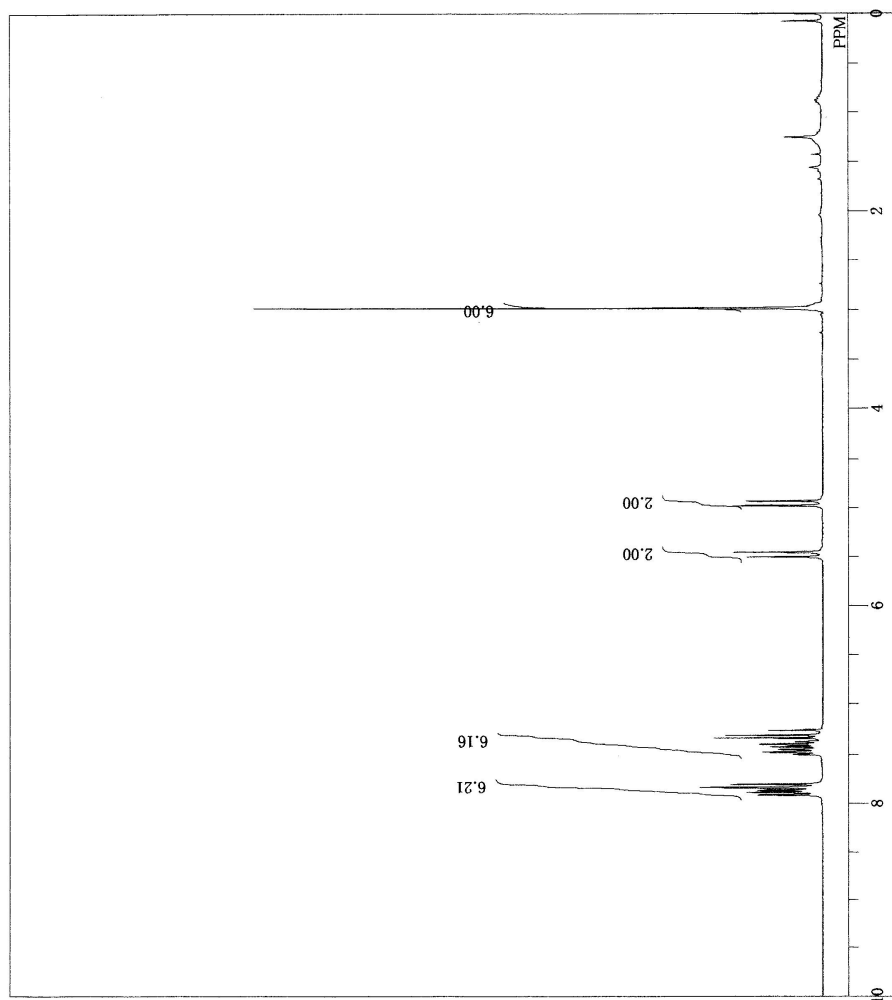

Di-*n*-butyl 8*H*,17*H*-naphtho[2,1-*b*]naphtho[1'',2'':5',6']pyrano[3',4':5,4]benzo[*d*]pyran-9,18-dicarboxylate (**8b**).

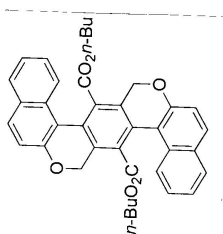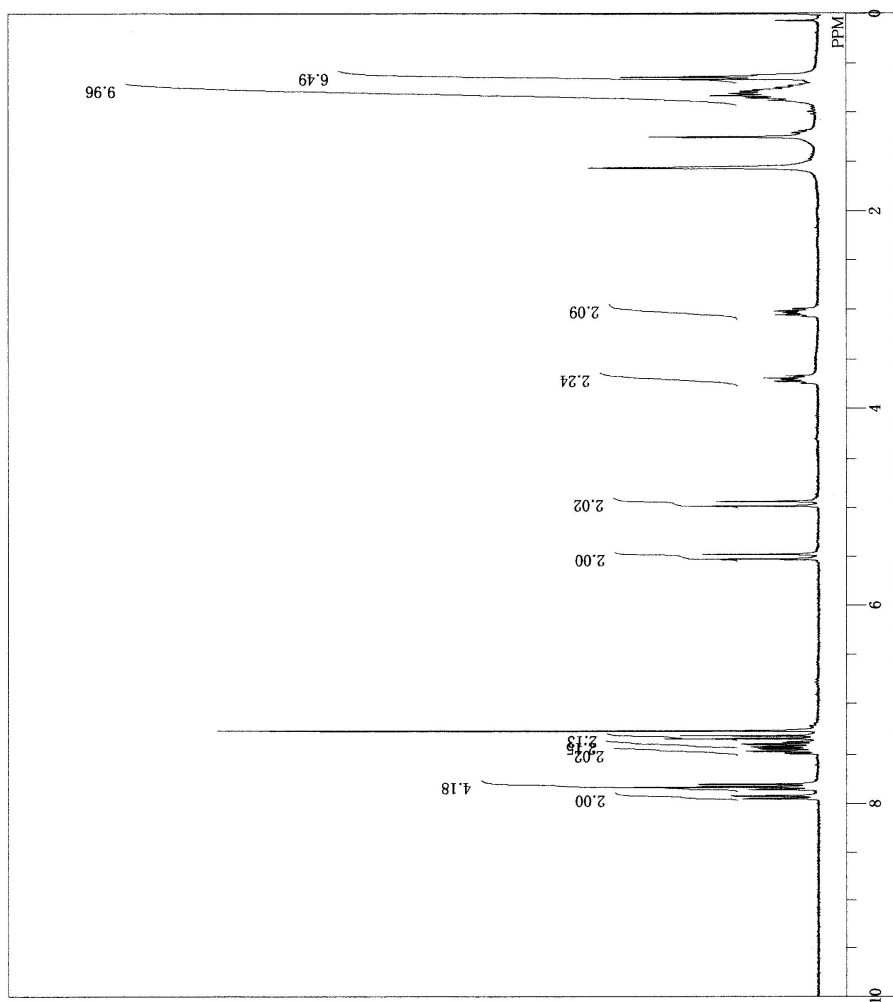

8*H*,17*H*-9,18-Di-*n*-butylnaphtho[2,1-*b*]naphtho[1'',2'':5',6']pyrano[3',4':5,4]benzo[*d*]pyran  
(8c)

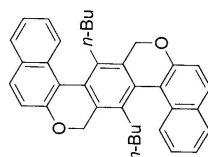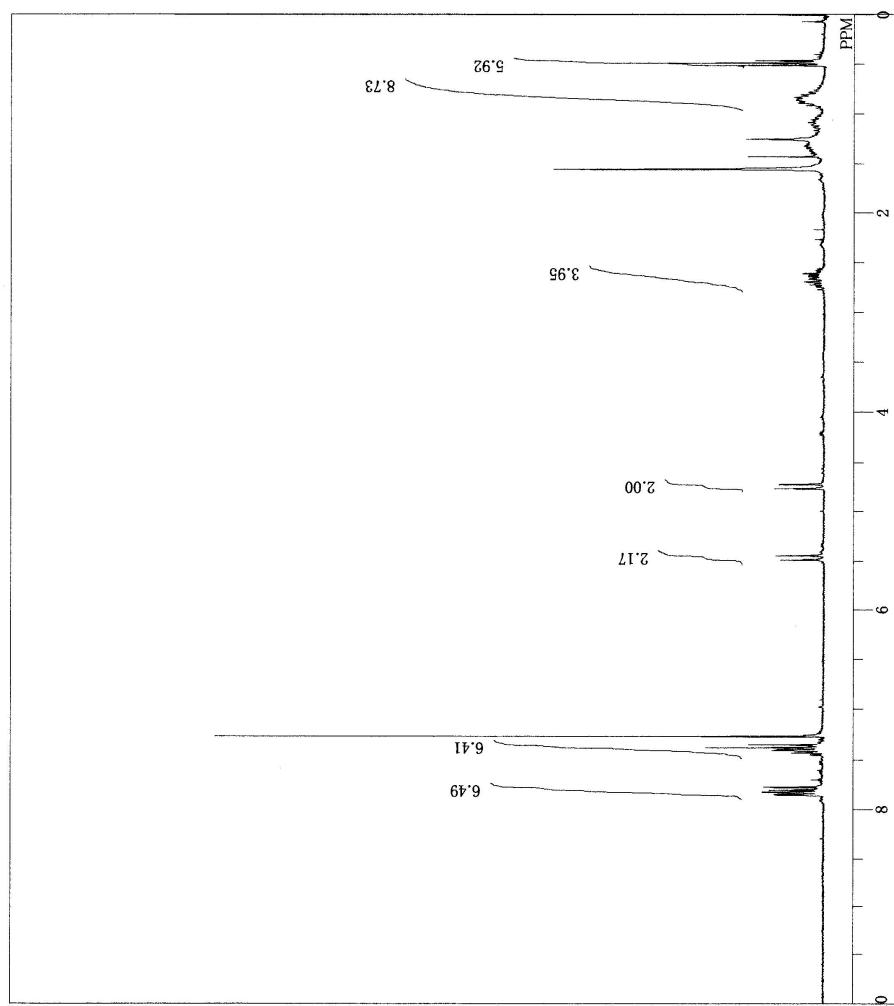

Dimethyl 6*H*,13*H*-chromeno[3',4':4,5]benzo[*c*]chromene-7,14-dicarboxylate (**8d**)

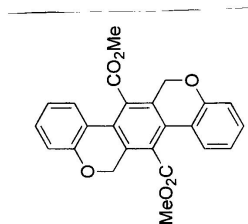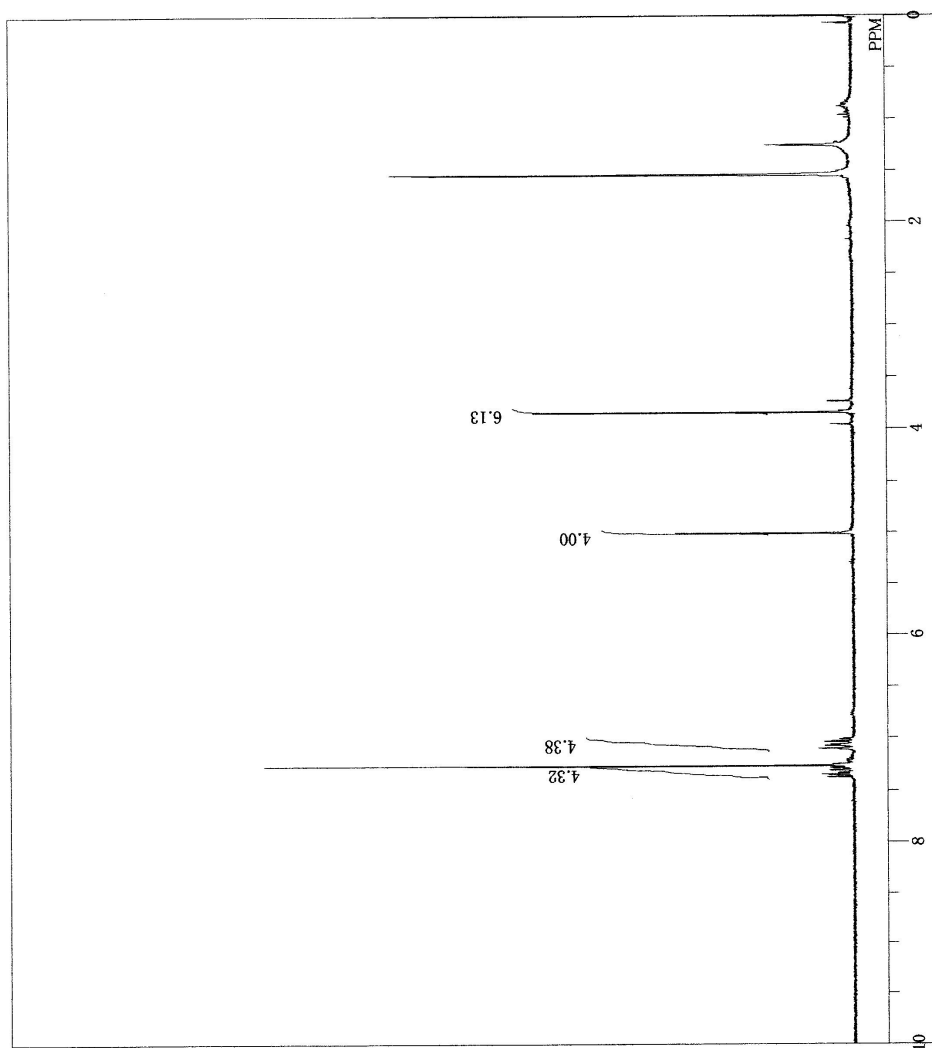



5,6-Bis-(2-hydroxynaphthalen-1-yl)-1,3-dihydroisobenzofuran-4,7-dicarboxylic acid  
diethyl ester (**10**)

---

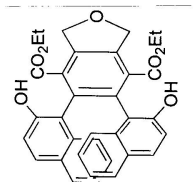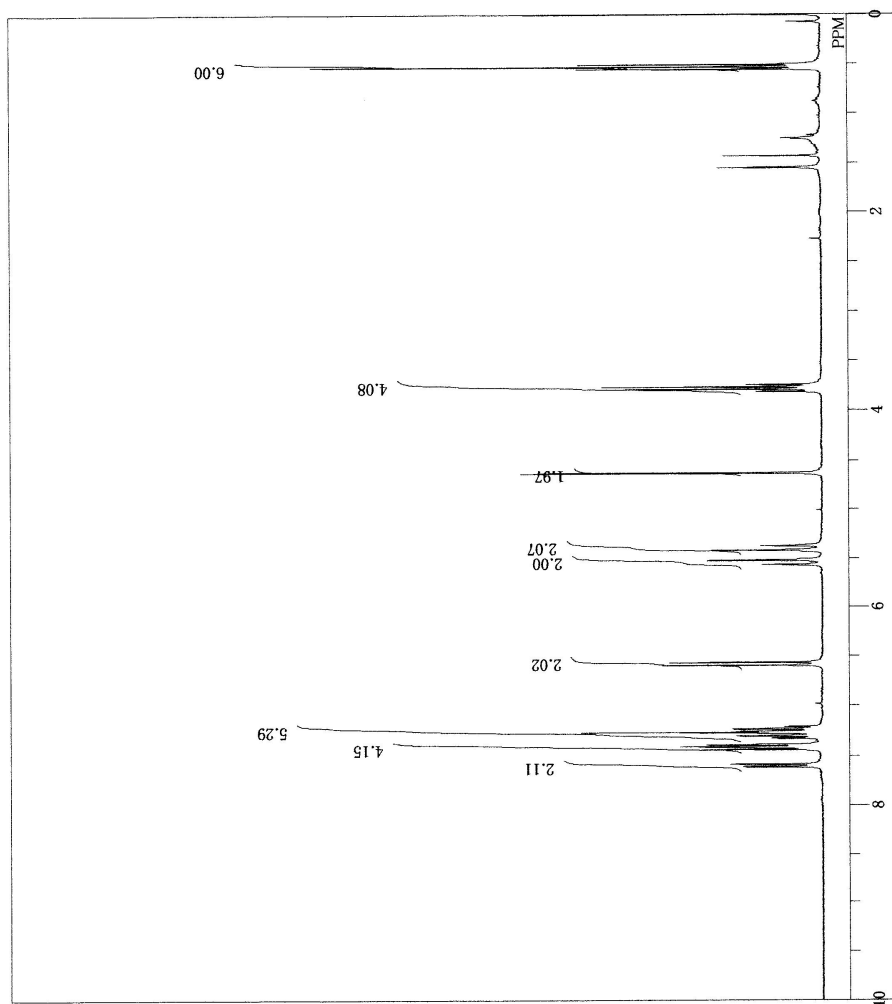

Supplement: Supplementary file 1 [file 4682503]
